# Supplementary material for: Consecutive Injection of High-Dose Lipopolysaccharide Modulates Microglia Polarization via TREM2 to Alter Status of Septic Mice
Source: MDPI journal article supplement (doi:10.3390/brainsci13010126), 2023-01-11
Supplement: s1 [file s1]

Fig. S1

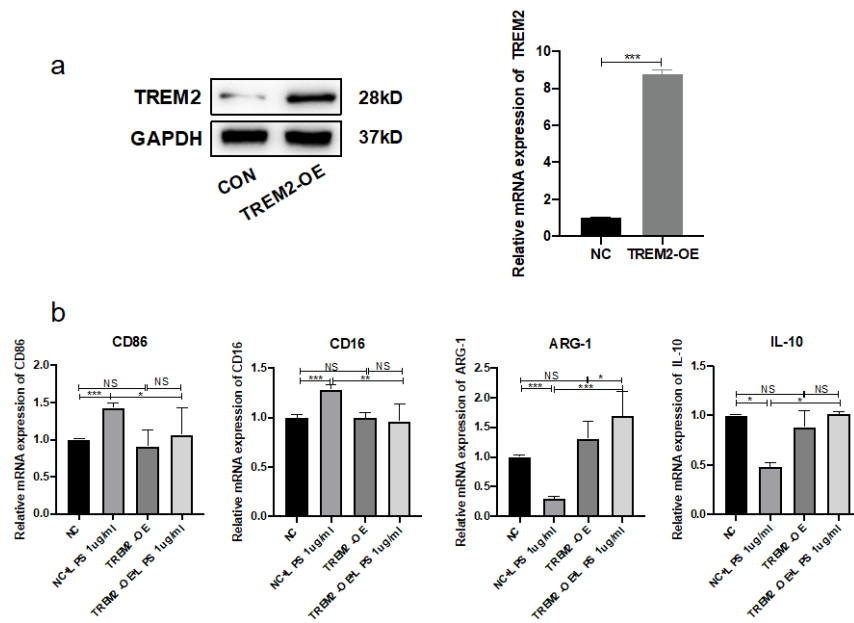

**Figure S1 Polarization of microglia overexpressing TREM2 after LPS treatment**

A. Protein and mRNA Expression of in TREM2-OE BV-2 cell.

B. mRNA expression of M1-type microglia markers (CD16 and CD86) and M2-type microglia markers (Arg-1 and IL-10) after 24h treatment of TREM2-OE and NC cells with different concentrations of LPS by PCR.

Fig. S2

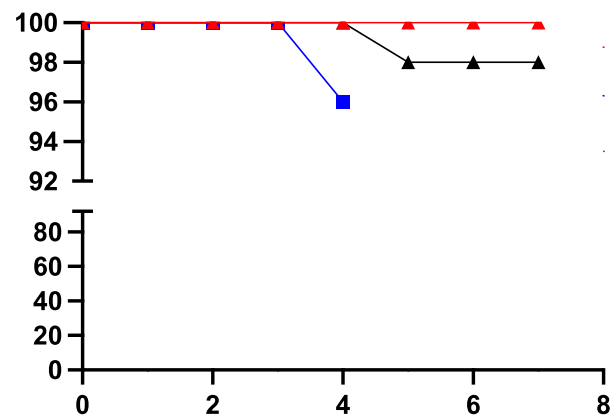

Figure S2. Survival of each group of mice

Fig. S3

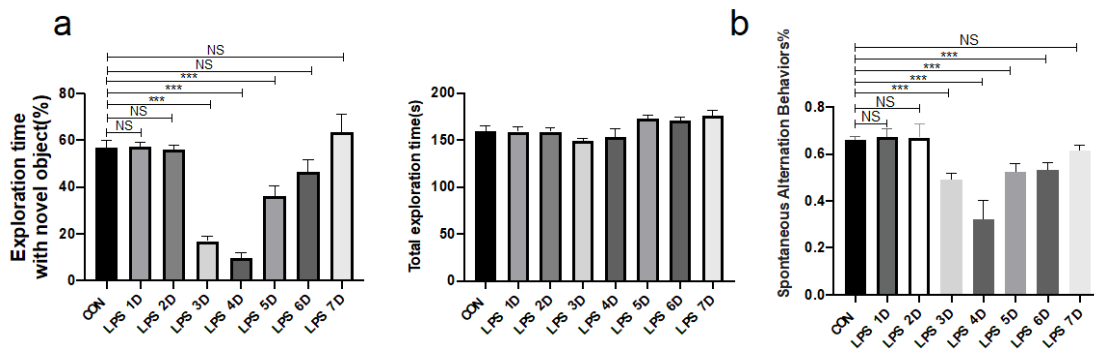

Figure. S3 Behavior of each group of mice

- A. Total and percentage of detection time of new objects in each group of mice.
- B. Percentage of mice in each group entering the different arms of the Y-maze in sequence.
